# Supplementary material for: Inhibition of transforming growth factor β-activated kinase 1 prevents inflammation-related cartilage degradation in osteoarthritis
Source: PubMed Central journal article supplement (PMC5041103; doi:10.1038/srep34497), 2016-09-29
Supplement: srep34497-s1.pdf [file srep34497-s1.pdf]

**Title:** Inhibition of transforming growth factor  $\beta$ -activated kinase 1 prevents inflammation-related cartilage degradation in osteoarthritis

**Authors:** Jin Cheng, Xiaoqing Hu, Linghui Dai, Xin Zhang, Bo Ren, Weili Shi, Zhenlong Liu, Xiaoning Duan, Jiying Zhang, Xin Fu, Wenqing Chen, Yingfang Ao\*

### Supplementary Figure S1

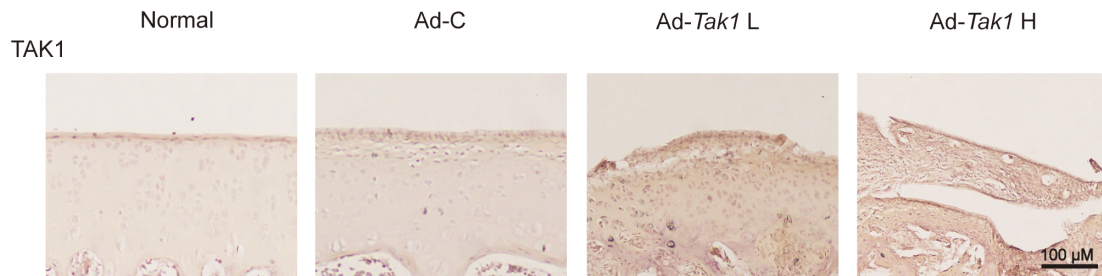

**Figure S1** IHC staining of TAK1 for rat cartilage from each group. Scale bar, 100  $\mu$ m.

### Supplementary Figure S2

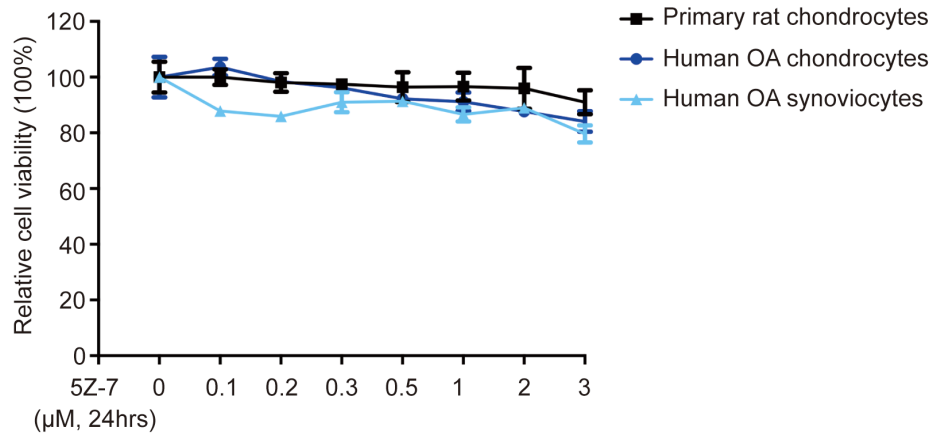

**Figure S2** TAK1 inhibitor 5Z-7 exhibited no significant cytotoxicity to chondrocytes and synoviocytes. The relative cell viability of primary rat chondrocytes, human OA chondrocytes and synoviocytes treated with increasing doses of 5Z-7. Data were presented as mean  $\pm$  SEM.

## Supplementary Figure S3

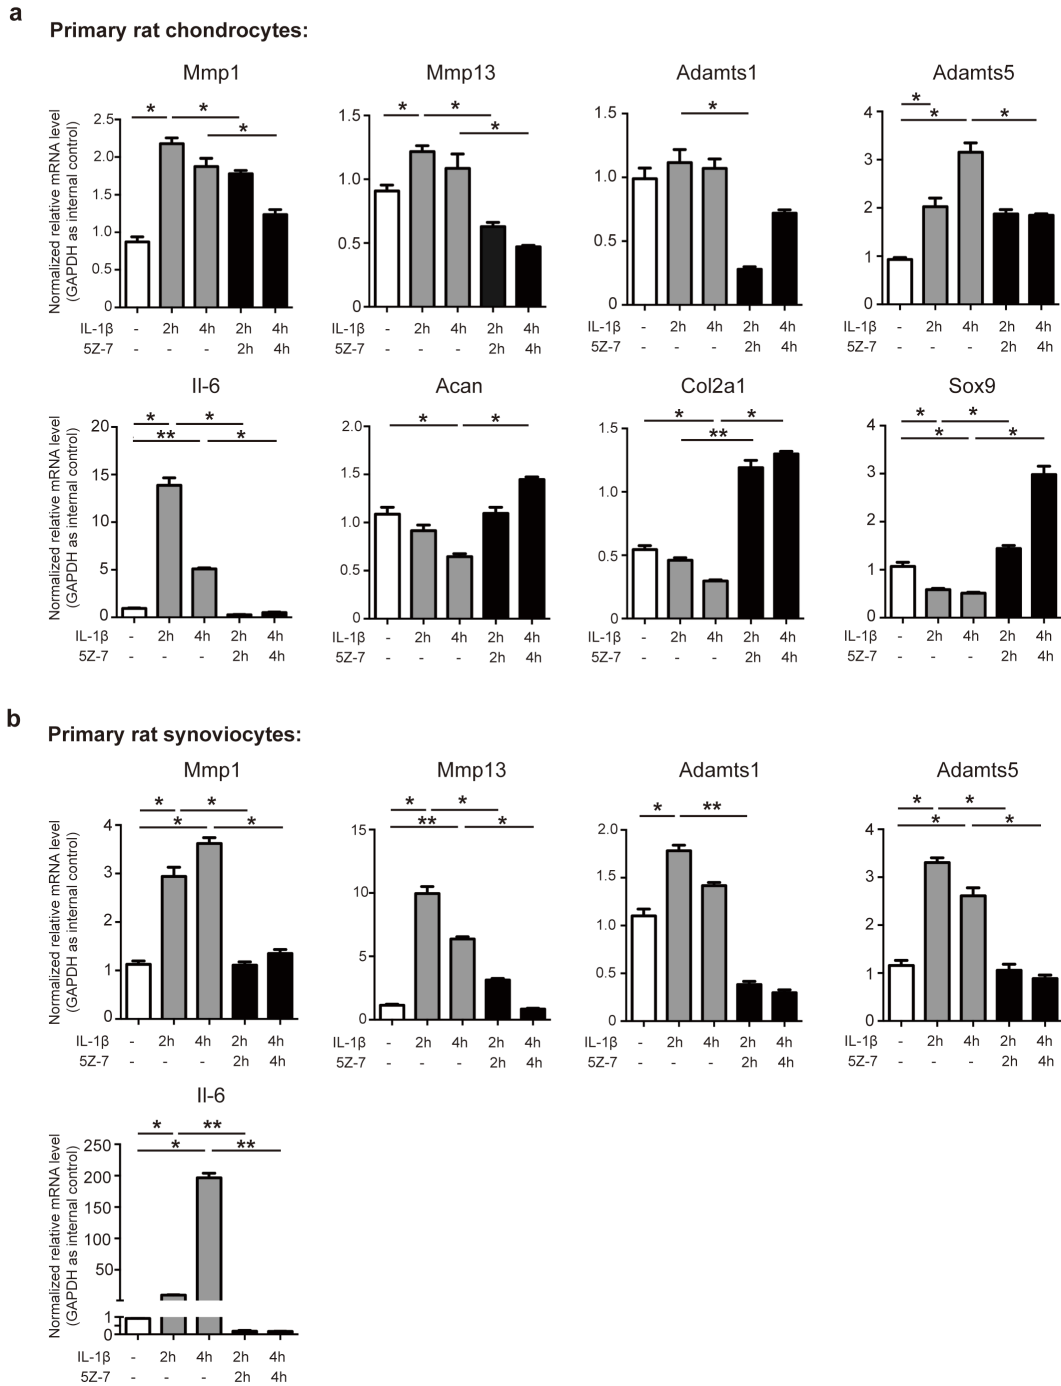

**Figure S3** 5Z-7 inhibited IL-1 $\beta$ -induced expression changes of ECM-related genes in chondrocytes and synoviocytes. **(a, b)** The mRNA expression level of classic ECM-related genes in **(a)** primary rat chondrocytes and **(b)** primary rat synoviocytes treated with IL-1 $\beta$  at indicated time points with or without 5Z-7. \* $P$ < 0.05, \*\* $P$ < 0.01.

## Supplementary Figure S4

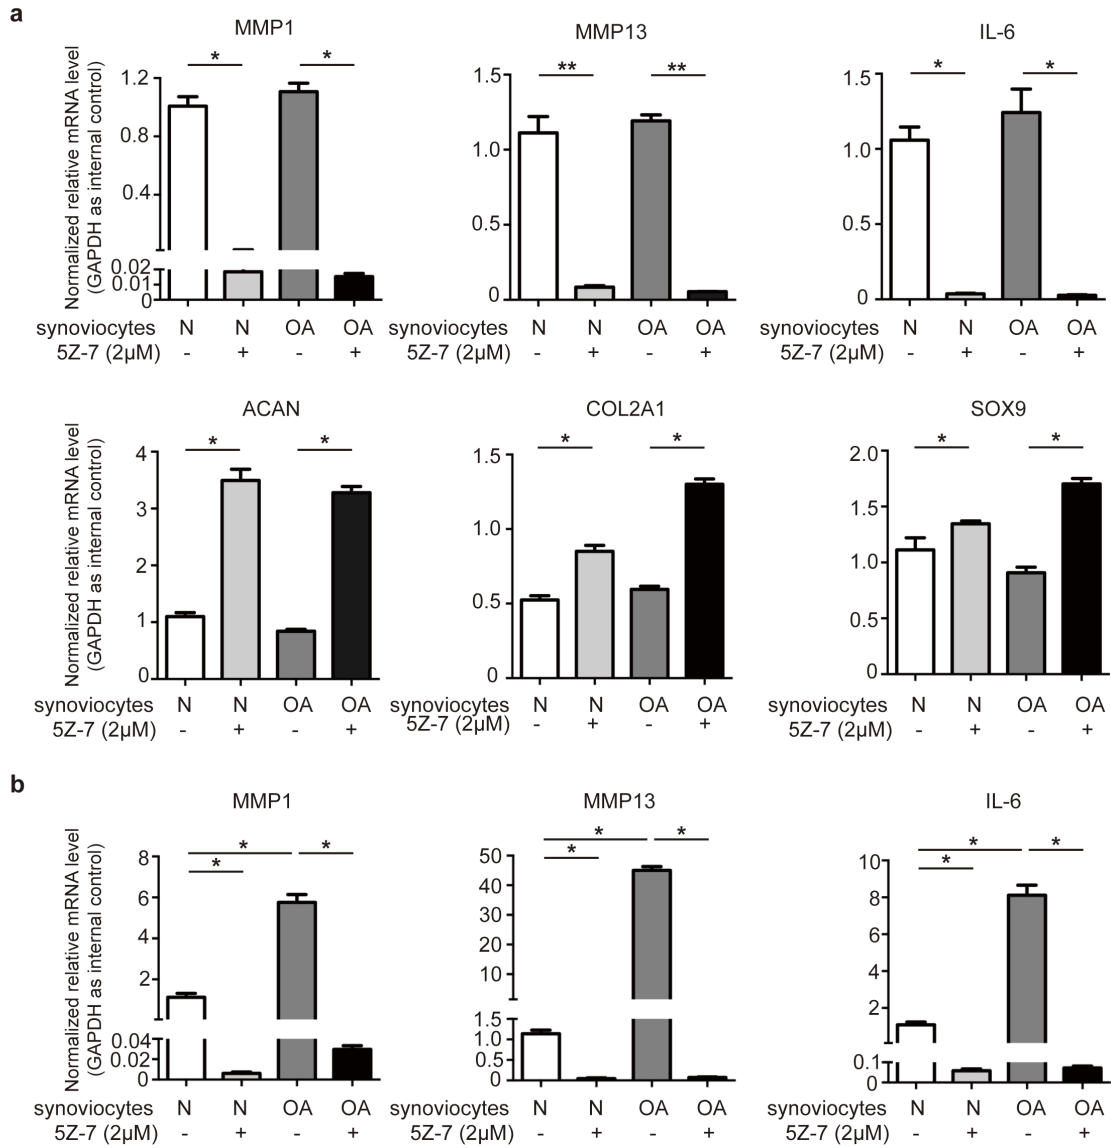

**Figure S4** TAK1 inhibition by 5Z-7 modulated microenvironment homeostasis in the co-culture system. **(a, b)** The mRNA expression level of classic ECM-related genes in **(a)** chondrocytes and **(b)** synoviocytes within the co-culture system after 48 hrs. \* $P < 0.05$ , \*\* $P < 0.01$ .

**Supplementary Table S1: The real-time primer sequences for ECM-related genes in rat and human.**

**Primer sequences for the detection of target genes expression in rats**

| <b>Gene name</b> | <b>Forward (5'-3')</b> | <b>Reverse (5'-3')</b> |
|------------------|------------------------|------------------------|
| <b>Mmp1</b>      | GCAGTGTGACACACATTGAC   | GATAACCTGGATCCATGGAC   |
| <b>Mmp13</b>     | CTGCGGTTCACTTTGAGGAC   | ACAGCATCTACTTTGTCGCC   |
| <b>Adamts1</b>   | GCCTACATGGTCACATCATTCT | TGGCGGTTGGCATCGTA      |
| <b>Adamts5</b>   | CACGACCCTCAAGAACTTTTGC | TCACATGAATGATGCCACATAA |
| <b>Il-6</b>      | AAGCCAGAGTCATTCAGAGC   | TTAGCCACTCCTTCTGTGAC   |
| <b>Acan</b>      | CCACTGGAGAGGACTGCGTAG  | GGTCTGTGCAAGTGATTGAG   |
| <b>Col2a1</b>    | CACCGCTAACGTCCAGATGAC  | GGAAGGCGTGAGGTCTTCTGT  |
| <b>Sox9</b>      | AGGAAGCTGGCAGACCAGTA   | ACGAAGGGTCTCTTCTCGCT   |
| <b>Gapdh</b>     | GCAAGTTCAACGGCACAG     | GCCAGTAGACTCCACGACA    |

Note: The annealing temperature of the primers is 60°C.

**Primer sequences for the detection of target genes expression in human**

| <b>Gene name</b> | <b>Forward (5'-3')</b>  | <b>Reverse (5'-3')</b>    |
|------------------|-------------------------|---------------------------|
| <b>MMP1</b>      | TGAACTCGGCCATTCTCTTG    | AACGTCCATATATGGCTTGG      |
| <b>MMP13</b>     | ACTGAGAGGCTCCGAGAAATG   | GAACCCCGCATCTTGGCTT       |
| <b>ADAMTS1</b>   | GTGATCGCATCATAGACTCC    | TGGCTCCAGTTGGAATTGTG      |
| <b>ADAMTS5</b>   | GAACATCGACCAACTCTACTCCG | CAATGCCACCGAACCATCT       |
| <b>IL-6</b>      | TTCGGTACATCCTCGACGGCATC | CAGCTCTGGCTTGTTCCCTCACTAC |
| <b>ACAN</b>      | ACTCTGGGTTTTTCGTGACTCT  | ACACTCAGCGAGTTGTCATGG     |
| <b>COL2A1</b>    | CCAGATGACCTTCCTACGCC    | TTCAGGGCAGTGTACGTGAAC     |
| <b>SOX9</b>      | AGCGAACGCACATCAAGAC     | CTGTAGGCGATCTGTTGGGG      |
| <b>GAPDH</b>     | GCACCGTCAAGGCTGAGAAC    | TGGTGAAGACGCCAGTGGA       |

Note: The annealing temperature of the primers is 60°C.
